# Supplementary material for: Interfacial Properties of Anisotropic Monolayer SiAs Transistors
Source: MDPI journal article supplement (doi:10.3390/nano14030238), 2024-01-23
Supplement: s1 [file s1]

*Supporting information*

## **Interfacial Properties of Anisotropic Monolayer SiAs Transistors**

**Feihu Zou,<sup>1,†</sup> Yao Cong,<sup>2,†</sup> Weiqi Song,<sup>1</sup> Haosong Liu,<sup>2</sup> Yanan Li,<sup>2</sup> Yifan Zhu,<sup>2</sup> Yue Zhao,<sup>1</sup>  
Yuanyuan Pan<sup>1,\*</sup>, Qiang Li<sup>1,\*</sup>**

<sup>1</sup>College of Physics, Qingdao University, Qingdao 266071, China

<sup>2</sup>State Key Laboratory of Heavy Oil Processing, Institute of New Energy, College of Chemistry and Chemical Engineering, China University of Petroleum (East China), Qingdao 266580, China

<sup>†</sup>These authors contributed equally to this work.

\*E-mail: panyy@qdu.edu.cn; liqiang@qdu.edu.cn

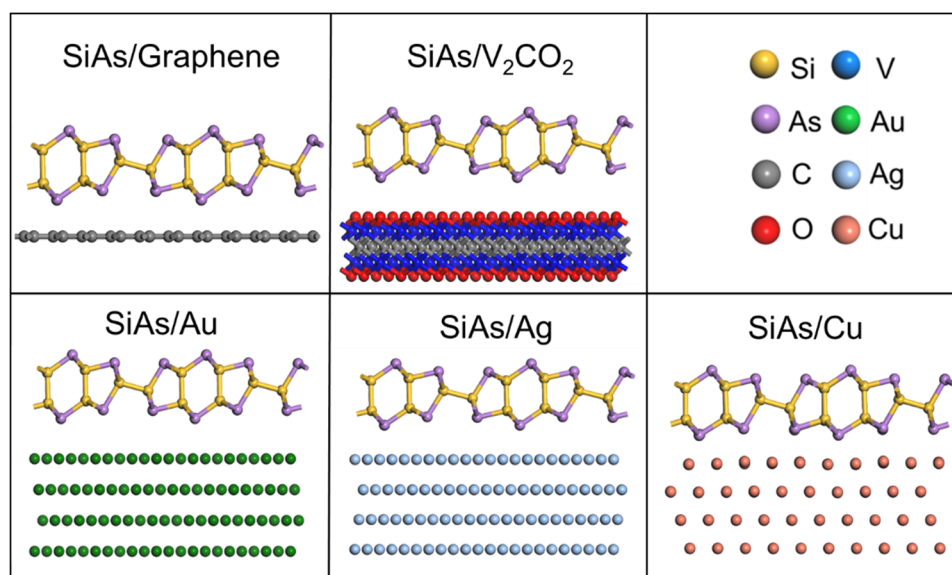

Figure S1. Side views of the non-optimized structures of ML SiAs on graphene, V<sub>2</sub>CO<sub>2</sub>, Au, Ag, and Cu surfaces.
